# Supplementary material for: Transcriptional signature in microglia associated with Aβ plaque phagocytosis
Source: PubMed Central journal article supplement (PMC8140091; doi:10.1038/s41467-021-23111-1), 2021-05-21
Supplement: 41467_2021_23111_MOESM2_ESM.pdf [file 41467_2021_23111_MOESM2_ESM.pdf]

## Description of Additional Supplementary Files

**Supplementary Data 1** Covariate associated genes and corresponding functional enrichment results. (Tab 1) List of covariate genes associated with or overlapping between age (n = 387 genes), region (n = 342 genes) and XO4<sup>+</sup>-associated gene expression signatures (n = 2,810 genes) from bulk RNA-sequencing analysis (see Methods for details). When more than one covariate is associated with a gene, this is indicated as follows, CovariateA\_CovariateB\_CovariateX. (Tabs 2-8) Gene Ontology (GO) and Kyoto Encyclopedia of Genes and Genomes (KEGG) pathways enrichment results for the genes associated with each covariate. Only significant enrichments are reported (adjusted p-value <0.05). P-values were adjusted using the default g:SCS algorithm from the gProfiler R package. The genes contributing the significant functional enrichment are also reported.

**Supplementary Data 2** Functional enrichment results for XO4<sup>+</sup> microglia genes. Gene Ontology (GO) and Kyoto Encyclopedia of Genes and Genomes (KEGG) pathways/terms enriched in gene expression signatures identified only in XO4<sup>+</sup> microglia in bulk (n = 2,031 genes) and single cell (n = 284 genes) analyses, respectively. Only significant pathways/terms are reported (adjusted p-value < 5%). p.adjust refers to Benjamini-Hochberg corrected p-value for the significance of enrichment. Genes contributing to the enrichment are also reported. Gene lists for microglial gene expression signatures (Fryer et al., DAM, MGnD, Friedman Neurodegeneration)<sup>13,14,31,33</sup> used in these comparisons are also provided.

**Supplementary Data 3** Relationship between XO4<sup>+</sup> associated DEPs and DEGs.

**Supplementary Data 4** Details of peptides in the mass spectrometry analysis. The peptides used for normalization of LC-SWATH-MS data, the peptides detected in spectral library samples from microglia and purified synaptosomes, and raw peptides concentrations detected in this study.

**Supplementary Data 5** DEGs from single cell RNA-seq analysis. List of DEGs in single cell analysis of FACS-sorted microglia. (i) Ageing DEGs (n = 104 genes with FDR<0.05), (ii) XO4<sup>+</sup> DEGs (n = 536 genes with FDR<0.05), (iii) specific ageing DEGs (i.e., non-overlapping with XO4<sup>+</sup> DEGs, n = 42 genes with FDR<0.05), (iv) specific XO4<sup>+</sup> DEGs (i.e., non-overlapping with Ageing DEGs, n = 474 genes with FDR<0.05), (v) list of DEGs overlapping between (i) and (ii) (n = 62 genes with FDR<0.05). LFC, Log<sub>2</sub>(Fold Change); Log CPM, Log<sub>2</sub>(Counts Per Million); F, F statistic (edgeR output); FDR, false discovery rate was estimated using the Benjamini-Hochberg method.

**Supplementary Data 6** qPCR data. Raw low input qPCR data from OHSCs, Ct values.

**Supplementary Data 7** Single Cell Regulatory Network Inference and Clustering (SCENIC) and pySCENIC results. (Tab 1 - Regulon activity) For each of the predicted top 10 regulons (*Hif1a*, *Elf3*, *Spi1*, *Erf*, *Fli1*, *Elf2*, *Maf*, *Etv3*, *Ets1*, and *Irf2*), we report the mean of normalized regulatory activity scores in each a priori cell type group (i.e., 6M WT, 24M WT, 6M 5xFAD XO4<sup>-</sup> and 5xFAD XO4<sup>+</sup>). Each regulon includes at least 100 genes that are expressed in at least 10% of the cells. (Tabs 2-11) Genes that

belong to each regulon. (Tab 12) Raw binarized pySCENIC results for Grubman et al. (893 microglia). (Tab 13) Raw binarized pySCENIC results for Zhou et al. (3,791 microglia).

**Supplementary Data 8** Analysis of human microglia clusters.

Tab 1 - Cluster composition of microglia in each patient

Tab 2 - DEGs associated with each human microglial cluster.

**Supplementary Data 9** Ingenuity Pathway Analysis (IPA) results.

The upstream activators of the *Hif1a* regulon predicted by IPA<sup>54</sup>. The activation z-score is a statistical measure of the match between the expected relationship direction of regulation and the observed gene expression. Positive z-scores are indicative of predicted activation. p-value of overlap refers to the significance of the overlap between the *Hif1a* regulon gene set and the regulated target genes predicted by IPA.

**Supplementary Data 10** Functional enrichment results for the XO4<sup>+</sup> genes modulated by upstream activators.

Kyoto Encyclopedia of Genes and Genomes (KEGG) pathways enriched in the gene set comprising the overlap (n = 65 genes) between (i) the network of genes induced by Pam3csk and repressed by rapamycin (n = 866 genes) and (ii) the gene expression signature associated with XO4<sup>+</sup> microglia (n = 1,092 genes). Only significant KEGG pathways are reported (adjusted p-value <5%). p.adjusted refers to Benjamini-Hochberg corrected p-value for the significance of enrichment. Genes contributing to the enrichment are also reported.

**Supplementary Data 11** 8bp sample index sequences used for sample multiplexing for bulk RNA-seq.

**Supplementary Data 12** List of TaqMan gene expression assays used for qPCR by Biomark Fluidigm 96.96.
